# Supplementary material
Source: MDPI journal article supplement (https://www.mdpi.com/2410-3888/8/12/573)
Supplement: s1 [file s1]

**Supplementary Information:**

**Table S1.** Mitogenomic dataset of barracuda fish species for comparative and phylogenetic analyses. Mitogenome of Blackspot threadfin within the family Polynemidae used as an outgroup taxon for phylogenetic construction.

| Family       | Organism Name                 | Accession No | Langht (bp) | References |
|--------------|-------------------------------|--------------|-------------|------------|
| Sphyraenidae | <i>Sphyraena sphyraena</i>    | OQ434241     | 16841       | This Study |
|              | <i>Sphyraena japonica</i>     | AP012501     | 16760       | [38]       |
|              | <i>Sphyraena jello</i>        | KT445895     | 16699       | [39]       |
|              | <i>Sphyraena pinguis</i>      | MN967008     | 16620       | [40]       |
|              | <i>Sphyraena barracuda</i>    | AP006828     | 16707       | [38]       |
|              | <i>Sphyraena borealis</i>     | OR581010     | 16739       | GenBank    |
| Polynemidae  | <i>Polydactylus sextarius</i> | KP259870     | 16836       | [53]       |

**Table S2.** Comparison of intergenic nucleotides and overlapping regions of six *Sphyræna* mitogenomes genes.

|       | <i>S. sphyraena</i> |       |     | <i>S. jello</i> |       |     | <i>S. pinguis</i> |       |     | <i>S. barracuda</i> |       |     |       | <i>S. japonica</i> |       |     | <i>S. borealis</i> |       |     |
|-------|---------------------|-------|-----|-----------------|-------|-----|-------------------|-------|-----|---------------------|-------|-----|-------|--------------------|-------|-----|--------------------|-------|-----|
| genes | start               | end   | IN  | start           | end   | IN  | start             | end   | IN  | start               | end   | IN  | genes | start              | end   | IN  | start              | end   | IN  |
| F     | 1                   | 70    | 0   | 1               | 69    | 0   | 1                 | 68    | 0   | 1                   | 69    | 0   | F     | 1                  | 69    | 0   | 1                  | 68    | 0   |
| 12S   | 71                  | 1035  | 0   | 70              | 1022  | 0   | 69                | 1022  | 0   | 70                  | 1022  | 0   | 12S   | 70                 | 1022  | 0   | 69                 | 1023  | 0   |
| V     | 1036                | 1108  | 0   | 1023            | 1095  | 0   | 1023              | 1094  | 0   | 1023                | 1095  | 0   | V     | 1023               | 1094  | 0   | 1024               | 1095  | 0   |
| 16S   | 1109                | 2889  | 127 | 1096            | 2838  | 115 | 1095              | 2839  | 48  | 1096                | 2838  | 115 | 16S   | 1095               | 2913  | 0   | 1096               | 2912  | 0   |
| L2    | 3017                | 3090  | 0   | 2954            | 3027  | 0   | 2888              | 2961  | 3   | 2954                | 3027  | 0   | L2    | 2914               | 2987  | 0   | 2913               | 2986  | 0   |
| ND1   | 3091                | 4065  | 5   | 3028            | 4002  | 5   | 2965              | 3936  | 4   | 3028                | 4002  | 5   | ND1   | 2988               | 3961  | 0   | 2987               | 3961  | 1   |
| I     | 4071                | 4141  | -1  | 4008            | 4078  | -1  | 3941              | 4010  | -1  | 4008                | 4078  | -1  | I     | 3962               | 4030  | -1  | 3963               | 4032  | -1  |
| Q     | 4141                | 4211  | 8   | 4078            | 4148  | 8   | 4010              | 4080  | -1  | 4078                | 4148  | 8   | Q     | 4030               | 4100  | -1  | 4032               | 4102  | -1  |
| M     | 4220                | 4289  | 0   | 4157            | 4225  | 0   | 4080              | 4150  | 1   | 4157                | 4225  | 0   | M     | 4100               | 4169  | 7   | 4102               | 4171  | 7   |
| ND2   | 4290                | 5351  | 30  | 4226            | 5275  | 42  | 4152              | 5198  | 7   | 4226                | 5275  | 42  | ND2   | 4177               | 5232  | 0   | 4179               | 5228  | 15  |
| W     | 5382                | 5452  | 3   | 5318            | 5389  | 2   | 5206              | 5278  | 0   | 5318                | 5388  | 3   | A     | 5233               | 5301  | 44  | 5244               | 5312  | 21  |
| A     | 5456                | 5524  | 1   | 5392            | 5460  | 1   | 5279              | 5347  | 1   | 5392                | 5460  | 1   | W     | 5346               | 5415  | 22  | 5334               | 5404  | 58  |
| N     | 5526                | 5598  | 47  | 5462            | 5534  | 38  | 5349              | 5421  | 36  | 5462                | 5534  | 38  | N     | 5438               | 5510  | 51  | 5463               | 5535  | 39  |
| C     | 5646                | 5712  | 12  | 5573            | 5638  | 1   | 5458              | 5522  | 0   | 5573                | 5638  | 1   | C     | 5562               | 5629  | -1  | 5575               | 5640  | 0   |
| Y     | 5725                | 5794  | 1   | 5640            | 5711  | 1   | 5523              | 5592  | 1   | 5640                | 5709  | 1   | Y     | 5629               | 5698  | 1   | 5641               | 5708  | 1   |
| COI   | 5796                | 7352  | -5  | 5713            | 7275  | -12 | 5594              | 7156  | -9  | 5711                | 7273  | -12 | COI   | 5700               | 7259  | -9  | 5710               | 7266  | -5  |
| S2    | 7348                | 7418  | 3   | 7264            | 7334  | 3   | 7148              | 7218  | 3   | 7262                | 7332  | 3   | S2    | 7251               | 7321  | 3   | 7262               | 7332  | 3   |
| D     | 7422                | 7493  | 10  | 7338            | 7409  | 5   | 7222              | 7290  | 7   | 7336                | 7407  | 5   | D     | 7325               | 7397  | 8   | 7336               | 7407  | 8   |
| COII  | 7504                | 8194  | 0   | 7415            | 8105  | 0   | 7298              | 7988  | 0   | 7413                | 8103  | 0   | COII  | 7406               | 8096  | 0   | 7416               | 8106  | 0   |
| K     | 8195                | 8268  | 8   | 8106            | 8180  | 5   | 7989              | 8063  | 5   | 8104                | 8178  | 5   | K     | 8097               | 8172  | 4   | 8107               | 8181  | 5   |
| ATP8  | 8277                | 8444  | -10 | 8186            | 8353  | -10 | 8069              | 8236  | -10 | 8184                | 8351  | -10 | ATP8  | 8177               | 8344  | -10 | 8187               | 8354  | -10 |
| ATP6  | 8435                | 9117  | 0   | 8344            | 9027  | -1  | 8227              | 8909  | 0   | 8342                | 9024  | 0   | ATP6  | 8335               | 9017  | 0   | 8345               | 9028  | -1  |
| COIII | 9118                | 9902  | 0   | 9027            | 9811  | 0   | 8910              | 9695  | 6   | 9025                | 9809  | 0   | COIII | 9018               | 9802  | 0   | 9028               | 9812  | 0   |
| G     | 9903                | 9972  | 1   | 9812            | 9882  | 0   | 9702              | 9771  | 0   | 9810                | 9880  | 0   | G     | 9803               | 9872  | 0   | 9813               | 9882  | 0   |
| ND3   | 9974                | 10322 | 0   | 9883            | 10231 | 0   | 9772              | 10120 | 0   | 9881                | 10229 | 0   | ND3   | 9873               | 10221 | 0   | 9883               | 10231 | 0   |
| R     | 10323               | 10391 | 0   | 10232           | 10300 | 0   | 10121             | 10189 | 0   | 10230               | 10298 | 0   | R     | 10222              | 10292 | 0   | 10232              | 10300 | 0   |
| ND4L  | 10392               | 10688 | -7  | 10301           | 10597 | -7  | 10190             | 10486 | -7  | 10299               | 10595 | -7  | ND4L  | 10293              | 10589 | -7  | 10301              | 10597 | -7  |
| ND4   | 10682               | 12062 | 0   | 10591           | 11971 | 0   | 10480             | 11860 | 0   | 10589               | 11969 | 0   | ND4   | 10583              | 11963 | 0   | 10591              | 11971 | 0   |
| H     | 12063               | 12131 | 0   | 11972           | 12040 | 0   | 11861             | 11930 | 0   | 11970               | 12038 | 0   | H     | 11964              | 12032 | 0   | 11972              | 12040 | 0   |
| S1    | 12132               | 12199 | 5   | 12041           | 12108 | 4   | 11931             | 11998 | 4   | 12039               | 12106 | 4   | S1    | 12033              | 12100 | 4   | 12041              | 12108 | 3   |
| L1    | 12205               | 12278 | 0   | 12113           | 12185 | 0   | 12003             | 12075 | 0   | 12111               | 12183 | 0   | L1    | 12105              | 12177 | 0   | 12112              | 12184 | 0   |
| ND5   | 12279               | 14117 | -4  | 12186           | 14024 | -4  | 12076             | 13914 | -4  | 12184               | 14022 | -4  | ND5   | 12178              | 14016 | -4  | 12185              | 14023 | -4  |
| ND6   | 14114               | 14635 | 0   | 14021           | 14542 | 0   | 13911             | 14432 | 0   | 14019               | 14540 | 0   | ND6   | 14013              | 14537 | 0   | 14020              | 14541 | 0   |
| E     | 14636               | 14704 | 3   | 14543           | 14611 | 3   | 14433             | 14501 | 4   | 14541               | 14609 | 3   | E     | 14538              | 14607 | 5   | 14542              | 14610 | 3   |
| Cytb  | 14708               | 15848 | 0   | 14615           | 15755 | 0   | 14506             | 15646 | 0   | 14613               | 15753 | 0   | Cytb  | 14613              | 15757 | 0   | 14614              | 15758 | 0   |
| T     | 15849               | 15921 | -1  | 15756           | 15828 | -1  | 15647             | 15717 | 0   | 15754               | 15826 | -1  | T     | 15758              | 15830 | -1  | 15759              | 15830 | -1  |
| P     | 15921               | 15991 | 0   | 15828           | 15900 | 0   | 15718             | 15788 | 0   | 15826               | 15898 | 0   | P     | 15830              | 15901 | 0   | 15830              | 15900 | 0   |
| CR    | 15992               | 16841 |     | 15901           | 16699 |     | 15789             | 16620 |     | 15899               | 16707 |     | CR    | 15902              | 16760 |     | 15901              | 16739 |     |

**Table S3.** Comparison of start and stop codons of six *Sphyræna* mitogenomes PCGs.

| Genes | <i>S. sphyræna</i> |      | <i>S. japonica</i> |      | <i>S. jello</i> |      | <i>S. pinguis</i> |      | <i>S. barracuda</i> |      | <i>S. borealis</i> |      |
|-------|--------------------|------|--------------------|------|-----------------|------|-------------------|------|---------------------|------|--------------------|------|
|       | start              | stop | start              | stop | start           | stop | start             | stop | start               | stop | start              | stop |
| ND1   | ATG                | TAA  | ATG                | TA-  | ATG             | TAA  | ATG               | TAA  | ATG                 | TAA  | ATG                | TAA  |
| ND2   | ATG                | TAA  | ATG                | AGA  | ATG             | TAA  | ATG               | TAA  | ATG                 | TAA  | ATG                | TAG  |
| COI   | GTG                | AGA  | GTG                | AGG  | GTG             | AGG  | GTG               | AGG  | GTG                 | AGG  | GTG                | AGA  |
| COII  | ATG                | T--  | ATG                | T--  | ATG             | T--  | ATG               | T--  | ATG                 | T--  | ATG                | T--  |
| ATP8  | ATG                | TAA  | ATG                | TAA  | ATG             | TAA  | ATG               | TAA  | ATG                 | TAA  | ATG                | TAA  |
| ATP6  | TTG                | TA-  | ATG                | TA-  | ATG             | TAA  | ATG               | TA-  | ATG                 | TA-  | ATG                | TAA  |
| COIII | ATG                | TA-  | ATG                | TA-  | ATG             | TA-  | ATG               | TAG  | ATG                 | TA-  | ATG                | TA-  |
| ND3   | ATG                | T--  | GTG                | T--  | ATG             | T--  | ATG               | T--  | ATG                 | T--  | ATG                | T--  |
| ND4L  | ATG                | TAA  | ATG                | TAA  | ATG             | TAA  | ATG               | TAA  | ATG                 | TAA  | ATG                | TAA  |
| ND4   | ATG                | T--  | GTG                | T--  | ATG             | T--  | ATG               | T--  | ATG                 | T--  | ATG                | T--  |
| ND5   | ATG                | TAA  | GTG                | TAG  | ATG             | TAA  | ATG               | TAA  | ATG                 | TAA  | ATG                | TAA  |
| ND6   | ATG                | TAA  | ATG                | TAA  | ATG             | TAG  | ATG               | TAA  | ATG                 | TAG  | ATG                | TAA  |
| Cyt b | ATG                | T--  | ATG                | TA-  | ATG             | T--  | ATG               | T--  | ATG                 | T--  | ATG                | TA-  |

**Table S4.** Comparison of anti-codons of six *Sphyraena* mitogenomes tRNA genes.

| Genes | <i>S. sphyraena</i> | <i>S. jello</i> | <i>S. pinguis</i> | <i>S. barracuda</i> | Genes | <i>S. japonica</i> | <i>S. borealis</i> |
|-------|---------------------|-----------------|-------------------|---------------------|-------|--------------------|--------------------|
| F     | AAG                 | AAG             | AAG               | AAG                 | F     | AAG                | AAG                |
| V     | CAU                 | CAU             | CAU               | CAU                 | V     | CAU                | CAU                |
| L2    | AAU                 | AAU             | AAU               | AAU                 | L2    | AAU                | AAU                |
| I     | UAG                 | UAG             | UAG               | UAG                 | I     | UAG                | UAG                |
| Q     | GUU                 | GUU             | GUU               | GUU                 | Q     | GUU                | GUU                |
| M     | UAC                 | UAC             | UAC               | UAC                 | M     | UAC                | UAC                |
| W     | ACU                 | ACU             | ACU               | ACU                 | A     | CGU                | CGU                |
| A     | CGU                 | CGU             | CGU               | CGU                 | W     | ACU                | ACU                |
| N     | UUG                 | UUG             | UUG               | UUG                 | N     | UUG                | UUG                |
| C     | ACG                 | ACG             | ACG               | ACG                 | C     | ACG                | ACG                |
| Y     | AUG                 | AUG             | AUG               | AUG                 | Y     | AUG                | AUG                |
| S2    | AGU                 | AGU             | AGU               | AGU                 | S2    | AGU                | AGU                |
| D     | CUG                 | CUG             | CUG               | CUG                 | D     | CUG                | CUG                |
| K     | UUU                 | UUU             | UUU               | UUU                 | K     | UUU                | UUU                |
| G     | CCU                 | CCU             | CCU               | CCU                 | G     | CCU                | CCU                |
| R     | GCU                 | GCU             | GCU               | GCU                 | R     | GCU                | GCU                |
| H     | GUG                 | GUG             | GUG               | GUG                 | H     | GUG                | GUG                |
| S1    | UCG                 | UCG             | UCG               | UCG                 | S1    | UCG                | UCG                |
| L1    | GAU                 | GAU             | GAU               | GAU                 | L1    | GAU                | GAU                |
| E     | CUU                 | CUU             | CUU               | CUU                 | E     | CUU                | CUU                |
| T     | UGU                 | UGU             | UGU               | UGU                 | T     | UGU                | UGU                |
| P     | GGU                 | GGU             | GGU               | GGU                 | P     | GGU                | GGU                |
